# Supplementary material
Source: PubMed Central journal article supplement (PMC3625298)
Supplement: 1219966110_pnas.201219966SI.pdf [file 1219966110_pnas.201219966SI.pdf]

# Supporting Information

Mills et al. 10.1073/pnas.1219966110

## SI Materials and Methods

The analyses presented in the main text are based on the Southwest Social Networks (SWSN) database and the associated Coalescent Communities Database (CCD) (1). The CCD is a large settlement database including size and temporal information for all known sites in the Southwest, with more than 12 rooms dating between A.D. 1200 and 1700. The SWSN Database is a spatial subset of the CCD, focused on a large portion of the Southwest west of the Continental Divide in New Mexico and Arizona, covering the period from A.D. 1200 to 1550. It is also an expansion of the CCD in that it includes frequency data on ceramic wares and types, the presence and forms of large-scale community architecture (platform mounds, great kivas, and plazas), newly verified site locations and room counts, and provenance information for obsidian objects. We defined 23 geographic subareas within the SWSN study area based on prior use in the Southwest to see how networks did or did not correspond with traditionally defined archaeological regions (Fig. 1). These subregions are based on a combination of drainage and material culture differences and are therefore not independent of the data used for network formation, but provide a way of comparing network results to past archaeological research.

The Continental Divide is a physiographic boundary but is meaningful for the study of social networks based on ceramics. During the period considered in this study, this physiographic feature falls along a relatively low population zone surrounded by densely populated areas to the east and west. The SWSN project area includes 52% of the 3,131 settlements in the CCD. Areas north of the SWSN project area that were not included in the current analyses are the northern Tusayan and Mesa Verde areas (an additional 254 settlements), both of which were completely depopulated after 1300. Areas to the south of the SWSN project area, in the states of Chihuahua and Sonora (an additional 274 sites), have sparse data for network analyses and therefore were excluded from this analysis. Such a spatial delineation of boundaries for defining social networks is also common in contemporary network analysis and is consistent with the assumptions of network theory as, unlike social groups, networks “have no natural boundaries” (2).

**Ceramic Networks.** In adding ceramic data, we searched published and unpublished materials (including culture resource management reports) and museum archives for information on ceramic wares and types. We also conducted analyses of museum collections and infield analyses of ceramics for sites in areas that did not have previously collected data. Our network analyses exclude “grab samples” and in most cases are from screened excavation contexts and systematically collected surface contexts such as transects or 1-m-diameter collection units. Although potential issues are raised when comparing ceramic assemblages with dramatically different sample sizes or comparing surface and excavation data, tests described below suggest that the macroregional results presented in this study are robust to these potential sources of variation.

In the Southwest, ceramic wares are defined on the basis of surface treatment (e.g., slips, pigments, texturing, polishing, smudging, and color), paste characteristics (e.g., type of aplastic materials, paste color, and texture), and when present, paint types (e.g., carbon, mineral, or glaze). Within decorated wares such as those used in this study, Southwest archaeologists distinguish among different styles of decoration and surface treatment to create a binomial taxonomy of types that changed over time within wares. Wares were produced in different geographic regions of the Southwest, some over broad areas, whereas others

have more restricted distributions. Some wares have been divided into “series” that are parallel sequences of types made in different areas, such as the White Mountain Series and Zuni Series of White Mountain Red Ware. In these cases, we treated series as equivalent to wares because of the enhanced spatial control they provide. Of the 82 wares in the database, 49 are decorated (Table S1). Based on a large body of previously analyzed and reported mineralogical and chemical analyses, we estimate that 22 of the decorated wares were produced in only one subarea of the SWSN project study area. A few wares were only produced outside the study area (e.g., Rio Grande Glaze Ware). Only two wares were made in more than a few subareas: Cibola White Ware, which was made in 9 subareas and Roosevelt Red Ware (or Salado polychromes), which was made in 15 subareas. The subareas with the highest variety of locally produced decorated wares are the Puerco of the West (6 wares), Mogollon Rim (5 wares), Silver Creek (4 wares), and Zuni (4 wares). In most cases, subareas were characterized by three or fewer wares for any given time period.

The primary assumption of the methods used to construct ceramic networks here is that similarities or differences in the proportions of different kinds of ceramics can provide an indication of the strength of different kinds of relations among individual settlements and regions. For the purposes of this study, we focus exclusively on decorated ceramics as these wares typically circulated more frequently and over greater distances than undecorated ceramics in the Southwest and were more likely to consciously convey messages about status and group membership (e.g., ethnicity, polity, or religion) (3). These types were also more consistently classified across the study area than nondecorated wares. Of the 709 settlements for which we have ceramic data, we limited our sample to those 515 that have decorated ceramic counts  $\geq 30$  sherds (total count of 790,612 decorated sherds). For each of these 515 settlements (nodes), we then divide decorated ceramic assemblages into 50-y intervals based on the dated production ranges of each type, assumptions regarding the popularity curve for each type, and changes in population size and deposition rates through time (4).

Our chronological apportioning procedure is described in detail elsewhere (4) and is illustrated in Fig. S1. In short, for each type present at each site, we assume a standard normal curve based on the date range associated with that type and then isolate the portion of that curve that overlaps with the date range of the site in question. Next, we distribute portions of the total count of a type at the site based on the area of the popularity curve that falls within each 50-y interval. We then repeat this procedure for all types present at this site. Following this, in a step not illustrated in Fig. S1, we use the estimated growth trajectory of each site (determined based on either empirical information or an empirically based model of site growth and decline) to account for changes in site size and deposition rates through time that may influence the ceramic assemblage. Our population estimates and estimates of growth trajectories come from previously published research (1). Using this information, we apply an iterative fitting algorithm to adjust the assignment of individual sherds to each interval in which a site was occupied. Overall, this apportioning procedure is designed to allow for comparisons of assemblages from sites with different occupations spans and to minimize the effect of varying ceramic deposition rates at individual sites and variable chronological control in regional dataset.

After chronological apportioning, ceramic types were grouped into ware categories, which in the Southwest are typically long-lived, geographically cohesive, and easily distinguished sets of related ceramic types. Ceramic wares can provide an indication of

relationships among sites and regions, but are more robust to inconsistencies in recording among researchers than the finer type categories because the criteria for ware identifications are based on technological properties rather than on design style. This process allowed us to include large quantities of sherds of indeterminate type that were at least assigned to a ware category. These raw ceramic ware counts by site were converted into a matrix of similarities for each 50-y period using a similarity index ( $S_{ii'}$ ) defined as follows:

$$S_{ii'} = 1 - \frac{\sum_j |(f_{ij}/f_{i+}) - (f_{i'j}/f_{i'+})|}{2}$$

where  $S_{ii'}$  = ceramic similarity among site  $i$  and site  $i'$ ;  $f_{ij}$  = count of decorated ware  $j$  at site  $i$ ; and  $f_{i+}$  = total count of all decorated ceramic wares at site  $i$ .

This similarity index ranges from 0 to 1, with higher values indicating greater similarity in site assemblages. This measure is the inverse of the commonly used index of dissimilarity and mathematically identical to the Brainerd-Robinson index of similarity often used in archaeology, rescaled to range from 0 to 1 (5, 6). The resulting similarity matrices for each 50-y interval provide a common measure of the relationships from each site to every other site in the sample in terms of the proportions of all decorated ceramic wares. We used this measure of similarity as a proxy for the strength of relationships among sites in this ceramic network. As we note in the main text, similarities in the proportions of decorated ceramics can be produced through a number of social processes including exchange, emulation, migration, and frequent interaction. At the macroregional scale that is the focus of this study, we argue that this measure of ceramic similarity combines the effects of all of these processes to provide an indication of the strongest patterned social relationships among settlements and groups of settlements (7–11).

Although our analyses were conducted using the matrix of raw similarities among sites described above, it is also useful to define binary (present/absent) ties between sites for visual display of these data. This binarization discards some of the complexity of the data as graph level and node level statistics will vary depending on the specific threshold used to define a tie. Experimentation with varying thresholds suggests that high similarity scores (~60–75% of possible similarity) provide a reliable summary of the strongest relationships among sites and regions that is consistent with the more complex representations of raw similarities among sites. For the purposes of the graphics used in this study, we defined a tie between any two sites as a ceramic similarity score of  $\geq 0.75$ , but we rely on the raw, nonbinarized similarities where possible in calculating statistical measures such as eigenvector centrality.

Fig. 1 shows the binarized ties among sites with nodes positioned using the force-based Fruchterman-Reingold algorithm. This algorithm places nodes with similar sets of ties close together by creating ties that are roughly equal in length. The node sizes for each 50-y interval in this figure represent relative eigenvector centrality scores calculated based on the raw similarity matrices. Eigenvector centrality, is a measure of the overall importance or influence of a node within a network, based on the first eigenvector of the adjacency matrix, and usually calculated using binarized ties (12). Eigenvector centrality ( $c_i$ ) for each node using nonbinarized similarities is similar, but individual scores are proportional to the sum of its neighbors' similarity scores rather than simply the number of binary ties:

$$c_i \propto \sum_j a_{ij}c_j$$

where  $c_i$  and  $c_j$  = eigenvector centrality scores of sites  $i$  and  $j$ , respectively, and  $a_{ij}$  = similarity score between site  $i$  and site  $j$ .

Eigenvector centrality scores are standardized such that the sum of the squared scores is equal to the total number of nodes.

Eigenvector centrality is high for a particular node when it is similar to other nodes that are also highly central. This measure is particularly relevant for the decorated ceramic data used here as eigenvector centrality takes the structure of the entire network into consideration and the measure is appropriate for network relations defined through multiple flow processes. Multiple flow processes make as few assumptions about the direction and efficiency of the flow as possible. Eigenvector centrality does not assume that relationships flow solely from node to node but rather that a node can influence all neighbors simultaneously. This conceptualization and formal definition of centrality fits well with the multiple complex processes driving relationships of ceramic similarity (e.g., exchange, emulation, cultural transmission).

Fig. 2 displays the binarized ties among all sites described above, color coded by the geodesic distances between sites. Distances were calculated between sites in a Geographic Information System (GIS) using projected Universal Transverse Mercator (UTM) coordinates (North American Datum 1927).

**Assessing Sources of Variation for Ceramic Networks.** As mentioned briefly in the previous section, networks created based on ceramic frequency data are subject to a number of potential influences including sampling techniques, relative sampling effort at particular sites, and the total proportion of sites included in the database. It is difficult to directly determine the effects of all of these processes, but it is possible to assess the stability of various network measures to similar perturbations using resampling (i.e., bootstrapping) methods (13).

First, to evaluate the potential impact of ceramic sample size (a function of both sampling methods and relative sampling effort) on network structure, we created a series of bootstrap replicates of the original data set for one period covered in this study (A.D. 1250–1300) with the sample sizes held constant at values of 10, 20, and 30 sherds. These sample sizes are somewhat arbitrary but are considerably lower than the mean for the period in question for the actual data (mean = 528). To create the bootstrap data sets, we resampled with replacement from the observed ware distribution for each site to create three sets of 1,000 replicates of each site ceramic assemblage, with the total sample size held constant at the three chosen intervals (10, 20, and 30 sherds for 3,000 total replicates). Each of these bootstrap data sets was then analyzed using all of the methods described above: ceramic similarity indices were produced and network centrality measures were calculated. We then produced correlation coefficients (Pearson's  $r$ ) for the distributions of degree and eigenvector centrality scores between the actual data and each of the 1,000 bootstrap replicate data sets for each of the three sample sizes. We also defined binary networks using the same 0.75 cutoff for creating ties used above and calculated the absolute difference in network density. The mean correlations and density for each measure for each sample size are presented in Table S2. As this table shows, the correlations are quite high for all measures, and they also improve as the sample size increases. Mean differences in density are also small for all three sample sizes. As the above example illustrates, even with sample sizes that are considerably smaller than those represented in the actual data, broad patterns of similarity and centrality are robust to variation in ware frequency due to sample size as these patterns are primarily driven by the most common wares present. This result suggests that such patterns are also likely robust to other sources of variation in ware frequency such as differential formation processes and recovery context (e.g., surface versus subsurface), although the effects of these variables would require additional analysis.

Next, we conducted a series of bootstrap analyses designed to assess the potential effects of missing sites in our database. The

results we present here also draw on one period (A.D. 1250–1300), but we have conducted additional analyses for all periods with similar results. To simulate the effects of missing sites, we created several series of 1,000 bootstrap replicates of the original ceramic data set with varying percentages of the total site sample removed (25%, 50%, 75%, and 90% of the original sites removed). As in the previous example, similarity scores were produced and centrality scores calculated for each of these bootstrap replicates and calculated network density based on dichotomous ties (using the 0.75 similarity cutoff). Table S2 presents the mean correlation between actual and bootstrap data sets for degree and eigenvector centrality scores as well as the mean difference in network density (%) between actual and resampled data. As this table shows, mean correlations for centrality measures are all high, even when as many as 90% of the sites in the original sample are removed. Further, the largest mean difference in network density is only about 1.6% even when 90% of sites are removed. Overall, these results suggest that the distributions of centrality scores and density are both extremely robust to the inclusion or exclusion of specific sites. This suggests that the results presented here are unlikely to be influenced substantially by the absence of sites where ceramic data were not available.

**Spatial Analyses.** To explore the role of geography in promoting or constraining networks of interaction across our study area, we defined a measure of spatial connectivity among sites based on settlement location, site density, and terrain. The settlement data used for this portion of the study are derived from the CCD (1), which contains room counts and date ranges for all available sites of 13 rooms or more (ca. A.D. 1200–1700) within our study area and beyond. This database includes all known late pre-Hispanic sites, even those for which we do not have ceramic or obsidian data. During the interval considered here, much of the population of the Southwest resided in relatively large settlements, so this database likely contains the vast majority of residential settlements.

Because the spaces between settlements in our study area are dissected by numerous mountain ranges, valleys, and canyons, it is necessary to take terrain into account when assessing distances among sites. Here we use GIS methods for least cost analysis to take costs of travel in terms of energy expenditure into consideration. In this study, we use a simple travel cost model, described in detail elsewhere (14), based simply on slope (calculated based on a 30-m resolution digital elevation model), as well as the average weight and leg length of an individual. We do not argue that these results reconstruct the specific paths that would have been used in the past, but they do provide a better indication of the relative distances between sites than linear distances alone.

Our approach differs from traditional site catchment analyses in at least one important way; rather than characterizing local resources in the natural environment it focuses on social resources indicated by the proximity of other people with whom to engage in socially networked activities. A significant result of this distinction is that such network activities have the potential to link communities across large areas. Thus, sites may become part of linked groups connected by knowledge and information more easily across much greater distances than is logistically practical for many material resources.

To develop a measure of cost-adjusted proximity among all sites, we created a friction surface (a surface indicating the relative costs associated with travel in any direction) around all sites occupied during each 50-y interval. Fig. S2 displays all cost-adjusted buffers color coded by this measure of connectivity. We argue that this measure provides an indication of potential social connections among settlements as areas with a higher local site density across shorter distances might be expected to be areas with higher network density as expressed through other lines of

material evidence. Fig. S3 then shows the proportions of possible ties (i.e., density) among sites within overlapping 9-km cost-adjusted buffers and among sites in different buffers by time period for the northern vs. the southern Southwest. As these plots illustrate, such binarized ties are consistently more frequent for sites in the same buffer, but these differences diminish considerably for the A.D. 1350–1400 and A.D. 1400–1450 intervals in the southern Southwest. This result suggests that spatial proximity may have had less influence on strong connections in the south during the last few generations of the major pre-Hispanic occupation of the region.

Using these cost-adjusted site buffers, it is also possible to assess the degree to which material cultural similarities (ceramics and obsidian) are influenced by the spatial concentration of sites. Our basic assumption is that settlements within a common set of overlapping cost-adjusted buffers likely shared land use catchments and thus, we would expect a considerably greater degree of interaction and ceramic/obsidian similarity among settlements with overlapping buffers if patterns of similarity were strongly influenced by geography. For the purposes of this analysis, we used 9-km cost-adjusted buffers as a proxy for local connections as these buffers represent distances that could be traversed between sites, out and back, within half a day of travel (14). To assess the relationship between spatial concentration and ceramic similarity, we calculated the distribution of similarity scores among sites within overlapping 9-km buffers and then calculated similarity scores among sites that did not share overlapping 9-km buffers for each time period. We then compared similarity scores within and between buffers using a one-sided, nonparametric Mann–Whitney *U* test to assess the probability that sites within buffers had greater ceramic similarity than sites not in the same buffer.

As Table S3 shows, for all time periods, ceramic similarity scores were statistically significantly greater for sites within the same buffers than for sites in different buffers. However, the total difference in mean similarity scores for connections within and between buffers also decreases through time. Overall, this analysis suggests that the spatial distribution of sites does play a major role in the strength of social connections among sites, but the strength of this relationship diminishes through time. Moreover, as brought out in the main text, the ability of spatial distance to predict social connectivity in terms of degree centrality is low.

**Obsidian Networks.** Approximately 30 obsidian sources were commonly used by the pre-Hispanic inhabitants of the Southwest, and a unique trace element fingerprint has been established for each. We consider 11 major sources that were determined empirically to be used extensively within our study area. These sources vary considerably in nodule size and workability, as well as abundance that may have influenced preference to some extent. However, all frequently used sources are associated with ample quantities of workable obsidian nodules at least 5 cm in length. These nodules would have been easy to transport by foot and of sufficient size to produce the small projectile points for which they were almost exclusively used (15). At the large scale used in this paper, we assume that proximity and social factors were more important than small differences in quality in the procurement and exchange of these 11 commonly used sources.

We characterize obsidian procurement and exchange patterns using a large database of obsidian artifacts whose source determinations have been made using X-ray fluorescence (XRF). Our total sample includes more than 4,800 sourced artifacts from 140 late pre-Hispanic sites distributed throughout the project area (Tables S4 and S5). For a variety of factors, including where large cultural resource management projects have been conducted over the last 50 y, more sites with sourced obsidian are present in the southern portion of the project area than the northern portion. To determine where and when patterns of obsidian procurement differ from what we might expect based on geography alone, we

also developed a null model of obsidian procurement based on the cost-adjusted travel costs from each site to the nearest point it intersected the perimeter of the primary deposit of each major source (some of these deposits are extensive, covering many square kilometers). Secondary deposition of several sources in streambeds (e.g., Cow Canyon, Mule Creek) is well known, but poorly defined on the ground, so only primary deposits are considered here. However, we present only robust patterns in this paper that may be attenuated by procurement of secondarily deposited obsidian, but not negated.

Travel costs were estimated using the methods described in the previous section from each site with obsidian data to the perimeter of the 11 most intensively used obsidian sources, which account for more than 99% of all sourced samples. The relative travel costs from each of the 11 sources to each site were then used to create an expected obsidian distribution for each site where geography was the only consideration. Sites within a 1-d round trip from an obsidian source (18 cost-adjusted  $K_m$  each way) were expected to have only that local source. Sources greater than an estimated 10 d of travel from a site (>360 cost-adjusted  $K_m$ ) were considered to have no contribution. For the remaining nonlocal sources, obsidian source use was assumed to follow a distance decay inverse power law relationship. Using this function, expected proportional distance decay source assemblages were calculated for each site:

$$P_i = \frac{(1/d_i^2)}{\sum_j (1/d_j^2)}$$

where  $P_i$  = expected relative proportion of obsidian source  $i$ ;  $d_i$  = cost-adjusted distance from the nearest point of obsidian source  $i$  to site; and  $j$  = all nonlocal obsidian sources <360 cost-adjusted  $K_m$  from site.

To determine which sites deviated from expected proportions, we simulated 1,000 obsidian samples for each site using the proportions determined by the above distance decay formula as a multinomial probability distribution and with the sample size

equal to the actual sample for each site. We then calculated similarities between the proportions of sources represented in each actual assemblage and the expected assemblage based on the distance decay model using the measure of similarity described for ceramic networks above ( $S_{ij}$ ) ranging from 0 to 1 (with 1 equal to perfect similarity). Finally, we then calculated similarities between each of the 1,000 simulated assemblages for each site and the expected distance decay assemblage. Sites were defined as deviating from the distance decay expectation when the mean similarity score for the simulated assemblages was at least 2 SDs greater than the similarity score between the actual and expected assemblage. For sites that deviated from distance decay, the expected proportions of sourced obsidian artifacts were then subtracted from the actual proportions to determine which sources were over- or underrepresented and by how much. Over- and underrepresentation was divided into three categories: low, moderate, and high at minimum thresholds of 10%, 30%, and 50% more or less than expected. Fig. 4 shows the results of this procedure.

Finally, we compared ceramic similarities among sites that shared a common source overrepresentation with all sites with obsidian and ceramic data in our sample for the pre- and post-A.D. 1300 intervals. Table S6 shows the mean ceramic similarity for all sites that share an overrepresentation of a given source compared with the mean similarity for all other sites with obsidian. The third column shows probabilities based on one-sided, nonparametric Mann–Whitney  $U$  tests comparing the distribution of ceramic similarity scores for sites in which a particular source is overrepresented against those in which it is not. As described in the main text, before A.D. 1300, only sites that share an overrepresentation of the Jemez source have significantly higher ceramic similarity scores than those that do not share an overrepresentation of the Jemez source. After A.D. 1300, with the exception of the San Francisco Volcanics, sites that share a common overrepresentation of a specific source have significantly higher ceramic similarity scores than sites that do not share an overrepresentation of a specific source.

- Hill JB, Clark JJ, Doelle WH, Lyons PD (2004) Prehistoric demography in the Southwest: Migration, coalescence, and Hohokam population decline. *Am Antiq* 69(4):689–716.
- Borgatti S, Halgin DS (2011) On network theory. *Organizational Science* 22(5):1168–1181.
- Mills BJ, Crown PL, eds (1995) *Ceramic Production in the American Southwest* (Univ of Arizona Press, Tucson, AZ).
- Roberts JM, Jr., et al. (2012) A method for chronological-apportioning of ceramic assemblages. *J Archaeol Sci* 39(5):1513–1520.
- Brainerd GW (1951) The place of chronological ordering in archaeological analysis. *Am Antiq* 16:301–313.
- Robinson WS (1951) A method for chronologically ordering archaeological deposits. *Am Antiq* 16:293–301.
- Duff AI (2002) *Western Pueblo Identities: Regional Interaction, Migration, and Transformation* (Univ of Arizona Press, Tucson, AZ).
- Nelson MC, Kulow S, Peebles MA, Hegmon M, Kinzig A (2011) Resisting diversity in small scale societies: A long-term archaeological study. *Ecol Society* 16(1):article 25.
- Rautman AE (1993) Resource variability, risk, and the structure of social networks: An example from the prehistoric Southwest. *Am Antiq* 58(3):403–424.
- Adams EC, Duff AI, eds (2006) *The Protohistoric Pueblo World, A.D. 1275-1600* (Univ of Arizona Press, Tucson, AZ), pp 137–143.
- Peebles MA (2011) Identity and social transformation across the prehispanic Cibola World: A.D. 1150-1325. PhD dissertation (Arizona State Univ, Tempe, AZ).
- Wasserman S, Faust K (1997) *Social Network Analysis: Methods and Applications* (Cambridge Univ Press, New York, NY).
- Mills BJ, et al. (2013) *New Approaches in Regional Network Analysis*, eds Knappett C, Rivers R (Oxford Univ Press, New York, NY).
- Herhahn C, Hill B (1998) Modeling agricultural production strategies in the northern Rio Grande Valley, New Mexico. *Hum Ecol* 26:469–487.
- Shackley MS (2005) *Obsidian: Geology and Archaeology in the North American Southwest* (Univ of Arizona Press, Tucson, AZ).



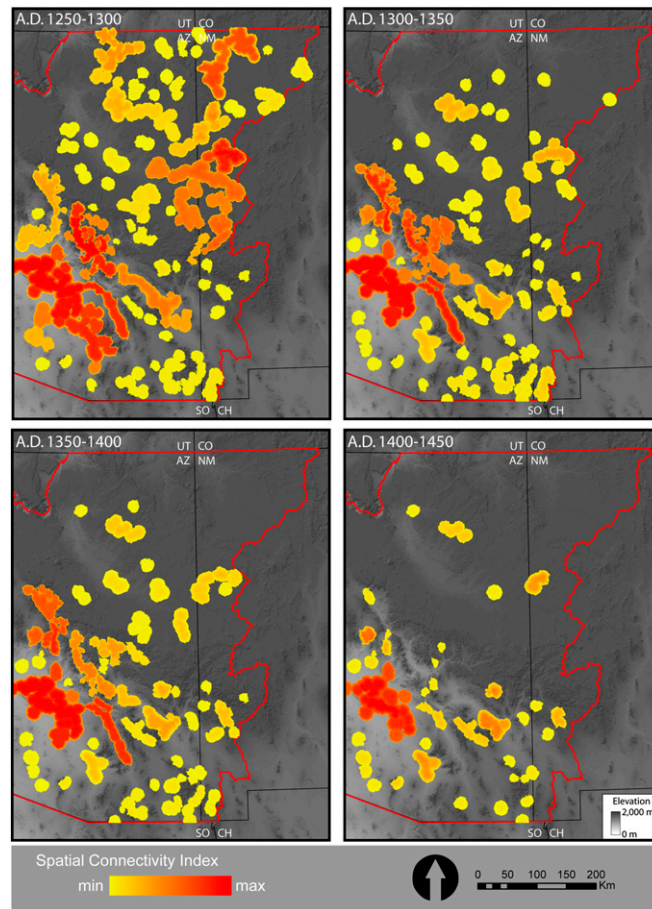

**Fig. S2.** Maps of the degree of spatial connectivity among settlements through time. These maps show overlapping cost-adjusted buffers (i.e., taking terrain into account) around all sites greater than 12 rooms. Sites with overlapping buffers are considered to be spatially connected. Buffers are color scaled based on the number of sites they contain. Darker colors represent portions of the study area characterized by greater spatial connectivity.

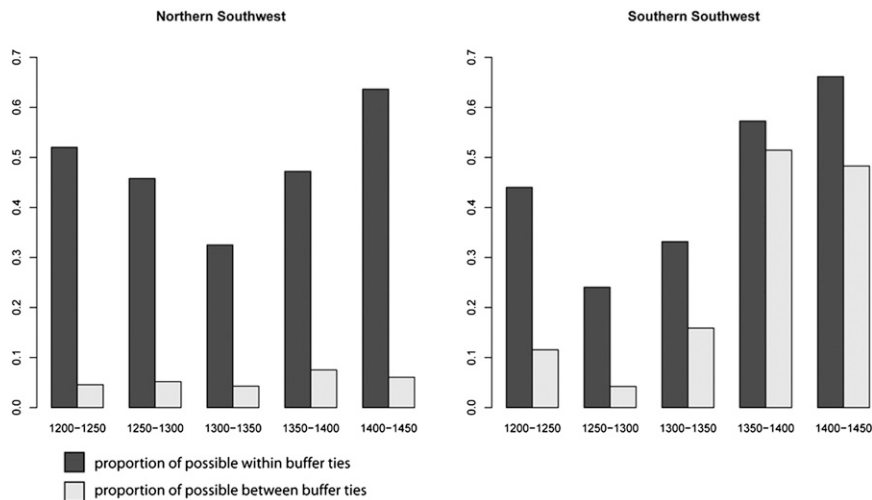

**Fig. S3.** Proportions of possible ties (i.e., density) among sites within overlapping 9-km cost-adjusted buffers and among sites in different buffers by time period. Ties are defined as sites with  $\geq 0.75$  similarity scores.

**Table S1. All decorated ceramic wares present within systematic ceramic collections**

| Ware                                | Starting date | Ending date | Total count |
|-------------------------------------|---------------|-------------|-------------|
| Alameda Brown Ware                  | 1065          | 1425        | 90          |
| Babacomari Series                   | 700           | 1450        | 4,011       |
| Chihuahuan Series                   | 1200          | 1450        | 1,233       |
| Chuska White Ware                   | 800           | 1300        | 3,712       |
| Cibola White Ware                   | 550           | 1330        | 175,591     |
| Coconino Buff Ware                  | 1050          | 1150        | 35          |
| Dragoon Series                      | 700           | 1100        | 465         |
| Early White Mountain Red Ware       | 1000          | 1300        | 53,481      |
| Grasshopper Ware                    | 1330          | 1375        | 152         |
| Hawikuh Glaze Ware                  | 1630          | 1680        | 337         |
| Hopi White Ware                     | 1100          | 1400        | 472         |
| Jeddito Orange Ware                 | 1250          | 1350        | 1,050       |
| Jeddito Yellow Ware                 | 1300          | 1900        | 18,432      |
| Jornada Mogollon Brown Ware         | 1000          | 1350        | 1,679       |
| Kinishba Red Ware                   | 1300          | 1400        | 7           |
| Kinishba Ware                       | 1300          | 1350        | 140         |
| Kintiel-Klagetoh Ware               | 1250          | 1300        | 494         |
| Late Middle Gila Red Ware           | 1300          | 1350        | 5           |
| Late White Mountain Red Ware        | 1280          | 1425        | 22,396      |
| Little Colorado White Ware          | 1050          | 1250        | 10,733      |
| Lower Colorado Buff Ware            | 800           | 1900        | 4,276       |
| Matsaki Buff Ware                   | 1375          | 1680        | 2,704       |
| Maverick Mountain Series            | 1265          | 1450        | 2,995       |
| Mesa Verde White Ware               | 575           | 1300        | 67,885      |
| Middle Gila Buff Ware and Gray Ware | 300           | 1450        | 128,589     |
| Mimbres White Ware                  | 850           | 1150        | 4,395       |
| Mogollon Brown Ware                 | 775           | 1400        | 7,933       |
| Navajo Painted Ware                 | 1750          | 1950        | 1           |
| Prescott Gray Ware                  | 1000          | 1425        | 8,091       |
| Puerco Valley Red Ware              | 1030          | 1200        | 3,727       |
| Rio Grande Glaze Ware               | 1313          | 1700        | 1           |
| Rio Grande White Ware               | 1050          | 1545        | 232         |
| Roosevelt Red Ware                  | 1275          | 1450        | 121,266     |
| Salado Series                       | 1150          | 1450        | 2,049       |
| San Carlos Brown Ware               | 1250          | 1450        | 2,055       |
| San Francisco Mountain Gray Ware    | 700           | 1100        | 218         |
| San Juan Red Ware                   | 700           | 1050        | 532         |
| San Simon Series                    | 650           | 1200        | 1,852       |
| Sichomovi Red Ware                  | 1900          | 1950        | 2           |
| Tizon Brown Ware                    | 900           | 1890        | 18          |
| Trincheras Series                   | 700           | 1450        | 197         |
| Tsegi Orange Ware                   | 1000          | 1300        | 22,200      |
| Tucson Basin Brown Ware             | 700           | 1350        | 85,516      |
| Tusayan Gray Ware                   | 600           | 850         | 76          |
| Tusayan White Ware                  | 800           | 1300        | 51,332      |
| Upper San Juan White Ware           | 900           | 1050        | 2           |
| Winslow Orange Ware                 | 1250          | 1400        | 1,797       |
| Zuni Glaze Ware                     | 1275          | 1450        | 22,243      |
| Zuni Matte-Paint Ware               | 1680          | 1900        | 436         |

**Table S2. Mean correlations of centrality measures and bootstrapped replicates for the A.D. 1250–1300 time period**

| Measure                                            | Sample size |       |       | Percentage of original sample removed |       |       |       |
|----------------------------------------------------|-------------|-------|-------|---------------------------------------|-------|-------|-------|
|                                                    | 10          | 20    | 30    | 25                                    | 50    | 75    | 90    |
| Mean correlation for degree centrality scores      | 0.959       | 0.975 | 0.98  | 0.997                                 | 0.993 | 0.979 | 0.926 |
| Mean correlation for eigenvector centrality scores | 0.973       | 0.983 | 0.987 | 0.999                                 | 0.998 | 0.992 | 0.927 |
| Mean difference in network density (%)             | 0.616       | 0.608 | 0.605 | 0.276                                 | 0.461 | 0.894 | 1.603 |

Sample size bootstrapping looks at mean correlations of centrality measures and network ties for bootstrapped replicates of 10, 20, and 30 sherds drawn from the original ceramic database. Percentage of original sample removed bootstrapping looks at mean correlations of centrality measures and mean difference in network density (%) for bootstrapped replicates with 25%, 50%, 75%, and 90% of sites removed at random.

**Table S3. Mann–Whitney *U* statistics and associated probabilities for comparisons of ceramic similarity values within overlapping 9-km cost-adjusted buffers and between buffers**

| Test                            | 1200–1250   | 1250–1300   | 1300–1350  | 1350–1400 | 1400–1450 |
|---------------------------------|-------------|-------------|------------|-----------|-----------|
| Mann–Whitney <i>U</i> statistic | 137,602,798 | 181,715,134 | 12,874,255 | 5,846,628 | 55,300    |
| <i>P</i>                        | <0.001      | <0.001      | <0.001     | <0.001    | <0.001    |
| Difference in means             | 0.58        | 0.48        | 0.34       | 0.38      | 0.32      |

These one-sided tests assess the probability that sites within a common buffer had higher ceramic similarity scores than sites not in the same buffer. Note that the differences in mean similarity for relations among sites within and between buffers generally decline through time.

**Table S4. Site ubiquities and artifact frequencies by obsidian source in the study area**

| Obsidian source    | Site ubiquity* | Artifact frequency |
|--------------------|----------------|--------------------|
| Major sources      |                |                    |
| Mule Creek         | 72             | 654                |
| San Fran Volcanics | 62             | 2,209              |
| Cow Canyon         | 55             | 327                |
| Superior           | 26             | 348                |
| Sauceda            | 25             | 669                |
| Jemez              | 20             | 109                |
| Mt Floyd           | 14             | 37                 |
| Los Vidrios        | 13             | 128                |
| Vulture            | 12             | 169                |
| Mt Taylor          | 9              | 21                 |
| Gwynn Canyon       | 6              | 33                 |
| Tank Mountains     | 5              | 6                  |
| Red Hill           | 4              | 7                  |
| Topaz              | 4              | 5                  |
| Sand Tanks         | 2              | 7                  |
| Antelope           | 2              | 3                  |
| Los Sitios         | 2              | 2                  |
| Bull Creek         | 1              | 1                  |
| Total count        |                | 4,735              |

Major sources are the most frequently recovered sources from the study area and form the basis of the quantitative analyses presented here.

\*The number of sites in which a particular source is present regardless of quantity.



**Table S5. Frequencies of sourced obsidian artifacts by site**

| Site name                | Site designation    | Sourced obsidian artifacts |
|--------------------------|---------------------|----------------------------|
| 111 Ranch                | AZ BB:6:73          | 16                         |
| 3-Up                     | LA 150373 (NM)      | 33                         |
| Adobe Hill               | AZ BB:1:32          | 14                         |
| Anderson Canyon Fort     | NA 39909 (MNA)      | 119                        |
| Apache Creek Pueblo      | LA 2949(NM)         | 4                          |
| Artifact Hill            | AZ BB:1:55          | 4                          |
| Ash Terrace              | AZ BB:2:19          | 42                         |
| Atsinna                  | NM G:15:1           | 1                          |
| None                     | AZ BB:3:22          | 1                          |
| None                     | AZ CC:1:3           | 3                          |
| None                     | AZ CC:2:185         | 1                          |
| None                     | AZ CC:2:23(BLM)     | 1                          |
| Aztec Ruins              | LA 45(NM)           | 21                         |
| Baby Canyon Site         | NA 12556 (MNA)      | 33                         |
| Bajada Site              | AZ BB:1:6           | 8                          |
| Bass Point Mound         | AZ U:8:23           | 24                         |
| Bayless Ruin             | AZ BB:11:2          | 12                         |
| Big Bell                 | AZ BB:6:2           | 6                          |
| Cactus Forest            | AZ AA:3:214         | 74                         |
| Camp Village             | AZ BB:6:5           | 2                          |
| Casa Buena               | AZ T:12:37          | 12                         |
| Casa Grande              | AZ AA:2:17          | 134                        |
| Casa Malpais             | AZ Q:15:3           | 4                          |
| Chavez Pass Pueblo       | AZ O:4:2            | 96                         |
| Chevelon Ruin            | AZ P:2:1            | 73                         |
| Cienega                  | NM G:15:6           | 8                          |
| Cline Terrace Mound      | AZ U:4:33           | 118                        |
| Cluff Ranch              | AZ CC:1:111/112     | 1                          |
| Crary Site               | AZ CC:1:53          | 5                          |
| Crescent Site            | AZ BB:8:6           | 4                          |
| Crismon                  | AZ U:9:173          | 23                         |
| Curtis Ruin(Buena Vista) | AZ CC:2:3           | 19                         |
| Danson 481               | Danson 481 (Danson) | 3                          |
| Davis Ranch Site         | AZ BB:11:36         | 47                         |
| Dewvester Site           | AZ CC:1:56          | 1                          |
| Dinwiddie                | NM S:14:1           | 8                          |
| Dudleyville Mound        | AZ BB:2:83          | 3                          |
| Eagle Pass               | AZ BB:4:1           | 1                          |
| Earven Flat Site         | AZ CC:2:5           | 5                          |
| El Polvoron              | AZ U:15:59          | 23                         |
| Elden Pueblo             | AZ I:14:2           | 34                         |
| Elliott Site             | AZ BB:11:27         | 35                         |
| Escalante                | AZ U:15:3           | 29                         |
| Fischer site             | AZ CC:2:100         | 4                          |
| Flieger                  | AZ BB:2:7           | 53                         |
| Foote Canyon Pueblo      | AZ W:8:16           | 18                         |
| Fornholt                 | LA 164471 (NM)      | 20                         |
| Fort Grant Pueblo        | AZ CC:5:1           | 5                          |
| Fort Grant Silo Site     | AZ CC:5:3(AF)       | 1                          |
| Fourmile Ruin            | AZ P:12:4           | 154                        |
| Gila Pueblo              | AZ V:9:52           | 103                        |
| Granary Row              | AZ U:3:299          | 4                          |
| Grand Canal              | AZ T:12:256         | 26                         |
| Grapevine Canyon         | AZ CC:5:5(AF)       | 19                         |
| Grapevine Pueblo         | NA 2803 (MNA)       | 292                        |
| Grasshopper              | AZ P:14:1           | 3                          |
| Haby Ranch               | AZ BB:3:16          | 4                          |
| Heshotauthla             | NM G:14:7           | 2                          |
| Higgins Flat             | LA 8682 (NM)        | 3                          |
| High Mesa                | AZ BB:7:5           | 12                         |
| Homol'ovi I              | AZ J:14:3           | 104                        |
| Homol'ovi II             | AZ J:14:15          | 56                         |
| Hooper Ranch Pueblo      | AZ Q:15:6           | 12                         |

Table S5. Cont.

| Site name                | Site designation     | Sourced obsidian artifacts |
|--------------------------|----------------------|----------------------------|
| Horse Camp Mill          | Danson 616 (Danson)  | 4                          |
| Howard                   | NA 14252 (MNA)       | 2                          |
| Hoyapi                   | AZ J:6:1             | 23                         |
| Jose Solas Ruin          | AZ BB:11:91          | 12                         |
| Kinnikinick              | NA 1629 (MNA)        | 511                        |
| Las Acequias             | AZ U:9:214           | 17                         |
| Las Colinas              | AZ T:12:10           | 94                         |
| Las Fosas                | AZ U:15:19           | 19                         |
| Las Tortugas             | AZ U:3:297           | 8                          |
| Leaverton                | AZ BB:6:11           | 15                         |
| Lippencott South Site    | AZ CC:2:102          | 1                          |
| Lippincott North Site    | AZ CC:2:104          | 1                          |
| Los Hermanos             | AZ U:3:5             | 6                          |
| Los Morteros             | AZ AA:12:57          | 50                         |
| Lost Mound               | AZ BB:2:3            | 33                         |
| Marana Mound             | AZ AA:12:251         | 214                        |
| Mercer Ruin              | AZ O:14:1            | 2                          |
| Middle of the Road Site  | AZ U:3:276           | 1                          |
| Mirabal                  | LA 426 (MNA)         | 13                         |
| Murphy Site–Safford East | AZ CC:2:103          | 1                          |
| Murphy Site–Safford West | AZ CC:1:52           | 4                          |
| None                     | NA 10067 (MNA)       | 3                          |
| None                     | NA 10070 (MNA)       | 1                          |
| None                     | NA 13317 (MNA)       | 1                          |
| New Caves                | NA 486 (MNA)         | 13                         |
| Old Shongopavi I         | NA 86 (MNA)          | 19                         |
| Owens-Colvin             | AZ CC:1:19           | 2                          |
| P Ranch Canyon site      | AZ CC:6:89 (BLM)     | 1                          |
| Pentagon Site            | AZ BB:3:18           | 1                          |
| Pinedale Ruin            | AZ P:12:2            | 8                          |
| Pinto Point Mound        | AZ V:5:66            | 32                         |
| Piper Springs            | AZ BB:1:34           | 4                          |
| Point of Pines Ruin      | AZ W:10:50           | 161                        |
| Pollack Ruin             | NA 4317 (MNA)        | 16                         |
| Pottery Point Ruin       | AZ V:1:166           | 1                          |
| Pueblo de los Muertos    | LA 1585 (NM)         | 7                          |
| Pueblo Grande            | AZ U:9:1             | 325                        |
| Pueblo La Plata          | NA 11648 (MNA)       | 60                         |
| Pueblo Pato              | NA 11434 (MNA)       | 46                         |
| Pueblo Salado            | AZ T:12:47           | 211                        |
| Pueblo Viejo             | AZ T:12:73           | 1                          |
| Puerco Ruin              | AZ Q:1:22            | 12                         |
| Rabid Ruin               | AZ AA:12:46          | 27                         |
| Rattlesnake House I & II | NA 11439/11490 (MNA) | 7                          |
| Rattlesnake Point        | AZ Q:11:118          | 17                         |
| Reeve Ruin               | AZ BB:11:26          | 44                         |
| Richardson Orchard       | AZ CC:6:33(BLM)      | 1                          |
| Richinbar Site (B)       | AZ N:16:6            | 30                         |
| Ridge Ruin               | NA 1785 (MNA)        | 4                          |
| Salmon Ruins             | LA 8846 (NA)         | 45                         |
| Schoolhouse Point Mound  | AZ U:8:24            | 232                        |
| Scribe S                 | NM:12:G3:4 (ZAP)     | 10                         |
| Sharon Site              | AZ CC:2:101          | 2                          |
| Sherwood Ranch           | AZ Q:11:48           | 43                         |
| Shumway Ruin             | AZ P:12:6            | 10                         |
| Spear Ranch              | AZ CC:1:11           | 3                          |
| Spier 170                | Spier 170 (Spier)    | 2                          |
| Stone Axe Ruin           | AZ Q:2:22            | 12                         |
| Swingle's Sample         | AZ BB:1:22           | 23                         |
| Table Rock Pueblo        | AZ Q:7:5             | 1                          |
| Tchado Spring            | LA 2148 (NM)         | 5                          |
| Tinaja                   | NM G:16:1            | 2                          |

**Table S5. Cont.**

| Site name                    | Site designation | Sourced obsidian artifacts |
|------------------------------|------------------|----------------------------|
| TJ Ruin                      | LA 54955 (NM)    | 51                         |
| Tonto Cliff Dwellings        | AZ U:8:47/48     | 22                         |
| Tri-R                        | ?                | 3                          |
| Tsukovi                      | ?                | 58                         |
| Turkey Hill Pueblo           | NA 660 (MNA)     | 36                         |
| University Indian Ruins      | AZ BB:9:3        | 56                         |
| Wallace Tank Ruin            | AZ Q:1:199       | 20                         |
| Wes Jernigan Site            | AZ CC:1:38       | 1                          |
| Whiptail Ruin                | AZ BB:10:3       | 3                          |
| Whitmer                      | AZ CC:2:69       | 3                          |
| Wooten-Claridge Terrace Site | AZ BB:3:19       | 1                          |
| Wright                       | AZ BB:2:51       | 14                         |
| WS Ranch                     | LA 3099 (NM)     | 3                          |
| Yuma Wash-Safford            | AZ CC:2:16       | 1                          |
| Yuma Wash-Tucson             | AZ AA:12:122     | 57                         |
| Total                        |                  | 4,805                      |

All site numbers are Arizona State Museum unless otherwise noted. AF, Amerind Foundation; BLM, Bureau of Land Management; MNA, Museum of Northern Arizona; NM, New Mexico; ZAP, Zuni Archaeological Program.

**Table S6. Comparisons of ceramic similarity scores for sites that share and do not share an overrepresentation of a specific obsidian source**

| Overrepresented obsidian source | Mean ceramic similarity among sites sharing source overrepresentation | Mean ceramic similarities among all other sites with obsidian | Mann-Whitney test probability |
|---------------------------------|-----------------------------------------------------------------------|---------------------------------------------------------------|-------------------------------|
| A.D. 1200–1250                  |                                                                       |                                                               |                               |
| Mule Creek Obsidian             | 0.314                                                                 | 0.292                                                         | 0.913                         |
| Cow Canyon                      | 0.263                                                                 | 0.155                                                         | 0.884                         |
| Jemez*                          | 0.35                                                                  | 0.208                                                         | 0.019                         |
| San Francisco Volcanics         | —                                                                     | —                                                             | —                             |
| Sauceda                         | —                                                                     | —                                                             | —                             |
| A.D. 1250–1300                  |                                                                       |                                                               |                               |
| Mule Creek Obsidian             | 0.292                                                                 | 0.227                                                         | 0.695                         |
| Cow Canyon                      | 0.303                                                                 | 0.15                                                          | 0.937                         |
| Jemez*                          | 0.415                                                                 | 0.143                                                         | <0.001                        |
| San Francisco Volcanics         | —                                                                     | —                                                             | —                             |
| Sauceda                         | —                                                                     | —                                                             | —                             |
| A.D. 1300–1350                  |                                                                       |                                                               |                               |
| Mule Creek Obsidian*            | 0.397                                                                 | 0.235                                                         | <0.001                        |
| Cow Canyon*                     | 0.66                                                                  | 0.299                                                         | <0.001                        |
| Jemez*                          | 0.404                                                                 | 0.134                                                         | <0.001                        |
| San Francisco Volcanics         | 0.261                                                                 | 0.221                                                         | 0.077                         |
| Sauceda*                        | 0.341                                                                 | 0.127                                                         | <0.001                        |
| A.D. 1350–1400                  |                                                                       |                                                               |                               |
| Mule Creek Obsidian*            | 0.603                                                                 | 0.379                                                         | <0.001                        |
| Cow Canyon*                     | 0.911                                                                 | 0.484                                                         | <0.001                        |
| Jemez*                          | 0.376                                                                 | 0.152                                                         | 0.0247                        |
| San Francisco Volcanics         | 0.324                                                                 | 0.351                                                         | 0.5871                        |
| Sauceda*                        | 0.477                                                                 | 0.358                                                         | 0.0244                        |

Comparisons for the San Francisco Volcanics and Sauceda sources are not possible before A.D. 1300 because of small sample sizes. The A.D. 1400–1450 interval is also excluded because of low sample sizes.

\*Overrepresented sources with significantly higher ceramic similarity than the site sample in general ( $\alpha = 0.05$ ).
